1 **Land-surface evapotranspiration derived from a first-principles primary production model**

2 Shen Tan<sup>1,2,3,4\*</sup>, Han Wang<sup>1,2,\*</sup>, Iain Colin Prentice<sup>1,4,5</sup>, Kun Yang<sup>1,2,6</sup>

3 1 Ministry of Education Key Laboratory for Earth System Modeling, Department of Earth System Science,  
4 Tsinghua University, Beijing 100084, China;

5 2 Joint Center for Global Change Studies (JCGCS), Beijing 100875, China;

6 3 Faculty of Geosciences, University Utrecht, Utrecht 3584 CB, Netherlands;

7 4 Department of Life Sciences, Imperial College London, Silwood Park Campus,

8 Buckhurst Road, Ascot, SL5 7PY, UK;

9 5 Department of Biological Sciences, Macquarie University, North Ryde, NSW 2109, Australia;

10 6 Center for Excellence in Tibetan Plateau Earth Sciences, Institute of Tibetan Plateau Research, Chinese  
11 Academy of Sciences, Beijing, 100101, China.

12 \* **Corresponding author:** Han Wang (wanghan\_sci@yahoo.com)

13 **Abstract:**

14 We propose an application of eco-evolutionary optimality theory in the context of monitoring and modelling  
15 physical land-surface processes. Evapotranspiration (ET) links the water and carbon cycles in the  
16 atmosphere, hydrosphere, and biosphere. We develop an ET modelling framework based on the hypothesis  
17 that canopy conductance acclimates to plant growth conditions so that the total costs of maintaining  
18 carboxylation and transpiration capacities are minimized. This is combined with the principle of  
19 co-ordination between the light- and Rubisco-limited rates of photosynthesis to predict gross primary  
20 production (GPP). Transpiration (T) is predicted from GPP via canopy conductance. No plant type- or  
21 biome-specific parameters are required. ET is estimated from T by calibrating a site-specific (but  
22 time-invariant) ratio of modelled average T to observed average ET. Predicted seasonal cycles of GPP were  
23 well supported by (weekly) GPP data at 20 widely distributed eddy-covariance flux sites (228 site-years),  
24 with correlation coefficients ( $r$ ) = 0.81 and root-mean-square error (RMSE) = 18.7 gC/week and

25 Nash-Sutcliffe efficiency coefficient (NSE) = 0.61. Seasonal cycles of ET were also well supported, with  $r =$   
26 0.85, RMSE = 5.5 mm week<sup>-1</sup> and NSE = 0.66. Estimated T/ET ratios (0.52–0.92) showed significant  
27 positive relationships to radiation, precipitation and green vegetation cover and negative relationships to  
28 temperature and modelled T ( $r = 0.84$ ). Although there are still uncertainties to be improved in the current  
29 framework, particularly in estimating T/ET, we see the application of eco-evolutionary principles as a  
30 promising direction for water resources research.

31 **Keywords:** canopy conductance, evapotranspiration, transpiration, gross primary production, plant  
32 optimality, ecosystem modelling

### 33 **Highlights**

- 34 • Building an evapotranspiration estimation framework based on *a priori* primary productivity model (the  
35 P model).
- 36 • Assessing the contribution of environmental indicators to the ratio of transpiration to  
37 evapotranspiration.
- 38 • Proving the reliability of this approach to estimate evapotranspiration.

### 39 **1. Introduction**

40 Evapotranspiration (ET) is a key process in the global terrestrial water cycle (Bai and Liu, 2018). ET  
41 comprises the biotic process of transpiration (T) via stomata, and the abiotic processes of evaporation from  
42 wet leaves (interception) and bare soil. ET is a core object for regional water management (Bastiaanssen et  
43 al., 2000; Zeng et al., 2019) and the mitigation of excessive water consumption (Fisher et al., 2017). It  
44 mediates energy exchange at the land-atmosphere interface and thereby influences regional and global  
45 climate (Trenberth et al., 2009). Transpiration can indicate the growth status of both natural and cultivated  
46 vegetation canopies due to the close coupling between carbon uptake and water transpired (Ershadi et al.,  
47 2014). Accurate modelling and monitoring of ET are thus important for multiple applications in ecology,  
48 hydrology and climate science.

49 Many ET models depend on remote sensing inputs (Mu et al., 2007, Wu et al., 2012). Apart from  
50 empirical relationships employed in early studies (Moran et al., 1994, Nagler et al., 2013) and more recent

51 machine-learning approaches (Jung et al., 2009, Torres et al., 2011, Elnashar et al., 2021), ET is generally  
52 predicted based on the land-surface energy balance. A conventional approach is to calculate the latent heat  
53 flux representing the energy flux during the vaporization of water as the residual of the surface energy  
54 balance equation (Bastiaanssen et al., 1998; Su, 2002; Norman et al., 1995). Sensible heat flux is commonly  
55 predicted based on its relationship with the temperature gradient between the atmosphere at reference height  
56 and the land surface, which can be simulated using remotely observed land surface temperature (LST)  
57 (Lagouarde et al., 1991). However, remotely sensed signals suffer from extensive cloud contamination. Due  
58 to the extreme sensitivity of sensible heat flux to LST, and LST to instantaneous climate conditions, the  
59 robustness of monitoring time-series ET by this strategy may be compromised by input data quality (Tan et  
60 al., 2019).

61 The Penman-Monteith (PM) equation provides an alternative, more direct approach to estimate the  
62 latent heat flux and ET. This equation has also been applied widely to calculate ET (Granger et al., 1989;  
63 Carlson et al., 1991; Allen et al., 1998; Cleugh et al., 2007; Mu et al., 2007; Leuning et al., 2008). Its  
64 application depends on specifying surface conductance. Jarvis (1976) suggested that surface conductance  
65 could be represented for different land-cover types by combining its empirical responses to meteorological  
66 variables including air temperature, downward shortwave radiation, and soil moisture. This approach has  
67 been applied globally (Mu et al., 2007, Zhang et al., 2019). However, ‘Jarvis-type’ modelling of surface  
68 conductance entails substantial uncertainties because of the need to calibrate multiple parameters for  
69 different land cover types.

70 Modern approaches to estimating surface conductance and ET in Earth System models (ESMs) rely on  
71 the intrinsic coupling between photosynthesis and transpiration, both regulated by stomata (Wong et al.,  
72 1979). Ball and Berry (1987) proposed an empirical model of stomatal conductance as a function of  
73 photosynthesis and relative humidity (RH). Leuning (1995) developed this idea further, noting that vapour  
74 pressure deficit (VPD) rather than RH is the driving force of ET (Leuning et al., 2008). These models have  
75 been applied widely at a global scale (Kowalczyk et al., 2006, Oleson et al., 2010; Jiang et al., 2016; He et  
76 al., 2018; Zhang et al., 2019). Medlyn et al. (2011) introduced a new stomatal conductance model based on  
77 the Cowan and Farquhar (1977) hypothesis on optimal stomatal behavior. This new model has features in  
78 common with the empirical models of Ball and Berry (1987) and Leuning (1995), and provides a partial  
79 theoretical basis for them. However, all these models require the calibration of parameters that vary

30 substantially among biomes and regions (Lin et al., 2015; Knauer et al., 2018) and an assumption of their  
31 constancy under changing environmental conditions. The multiplicity of poorly known parameters,  
32 combined with the questionable assumption that they are constant, is likely to limit the usefulness of current  
33 ET models for climate-change applications (Yang et al., 2019). Moreover, current ESMs show a pervasive  
34 bias, systematically underestimating the importance of transpiration – to a greater or lesser extent in  
35 different models – due to systematic errors in model representations of light absorption in plant canopies  
36 (Lian et al., 2018).

37 It would be highly desirable, therefore, to develop universal models of photosynthesis and stomatal  
38 conductance, applicable across biomes without re-calibration. A recently developed model for gross primary  
39 production (GPP) (the P model: Wang et al., 2017, Stocker et al., 2020) provides such a way to avoid the  
40 limitations of current models. At the core of the P model is a description of optimal stomatal behaviour as a  
41 function of environment that is equally applicable to all C<sub>3</sub> plants (Prentice et al., 2014). The P model has  
42 been used to diagnose the response of the terrestrial carbon cycle to changes in climate and atmospheric CO<sub>2</sub>  
43 (e.g. Keenan et al. 2016; Stocker et al., 2020); as part of a global monitoring system for GPP  
44 (<https://terra-p.vito.be>); and as the basis for a generic scheme to predict wheat yields (Qiao et al., 2020).  
45 Pérez-Priego et al. (2018) combined the P model and an empirical canopy conductance model to partition  
46 observed ET into transpiration and evaporation, suggesting the potential to employ the P model globally to  
47 estimate the transpiration component of ET.

48 Here we propose a modelling framework for ET based on the PM equation and the P model's estimation  
49 of canopy conductance. This framework combines optimality theory with remote sensing data. We use  
50 site-level observations to evaluate the model.

## 51 ***2 Materials and methods***

### 52 *2.1 A general framework for modelling ET*

53 The central operation in our proposed ET modelling framework is the estimation of canopy conductance,  
54 based on GPP and the ratio of leaf-internal to ambient CO<sub>2</sub> partial pressure ( $c_i/c_a$ , denoted by  $\chi$ ), both of  
55 which are calculated by P model. This calculation is independent of plant functional types, except for the  
56 necessary distinction between C<sub>3</sub> and C<sub>4</sub> plants. The predicted GPP and  $\chi$  values are used to estimate canopy

37 conductance to CO<sub>2</sub>, which is multiplied by 1.6 to yield the estimated average canopy conductance to water  
 38 vapour ( $G_s$ , mol m<sup>-2</sup> s<sup>-1</sup>). We then estimate T with the PM equation driven by the predicted canopy  
 39 conductance and meteorological variables. A weekly time step is adopted for the prediction of GPP, T and  
 40 ET because the theory behind the P model is based on leaf-level acclimation of photosynthetic parameters to  
 41 environment, which occurs over a time scale of weeks.

42 The ratio T/ET is constrained by local environment due to water limitation under dry conditions and  
 43 energy limitation under wet conditions. There is evidence that this ratio is temporally conservative without  
 44 disturbance on the local environment (Paschalis et al. 2018), perhaps because local wetness condition  
 45 simultaneously controls transpiration and soil evaporation. Here, accordingly, we calculate site-specific (but  
 46 time-invariant) values of T/ET from the predicted T and observed ET, allowing us both to test our  
 47 simulations of the seasonal cycle of ET and to explore the potential environmental dependencies of this ratio  
 48 (Fig. 1).

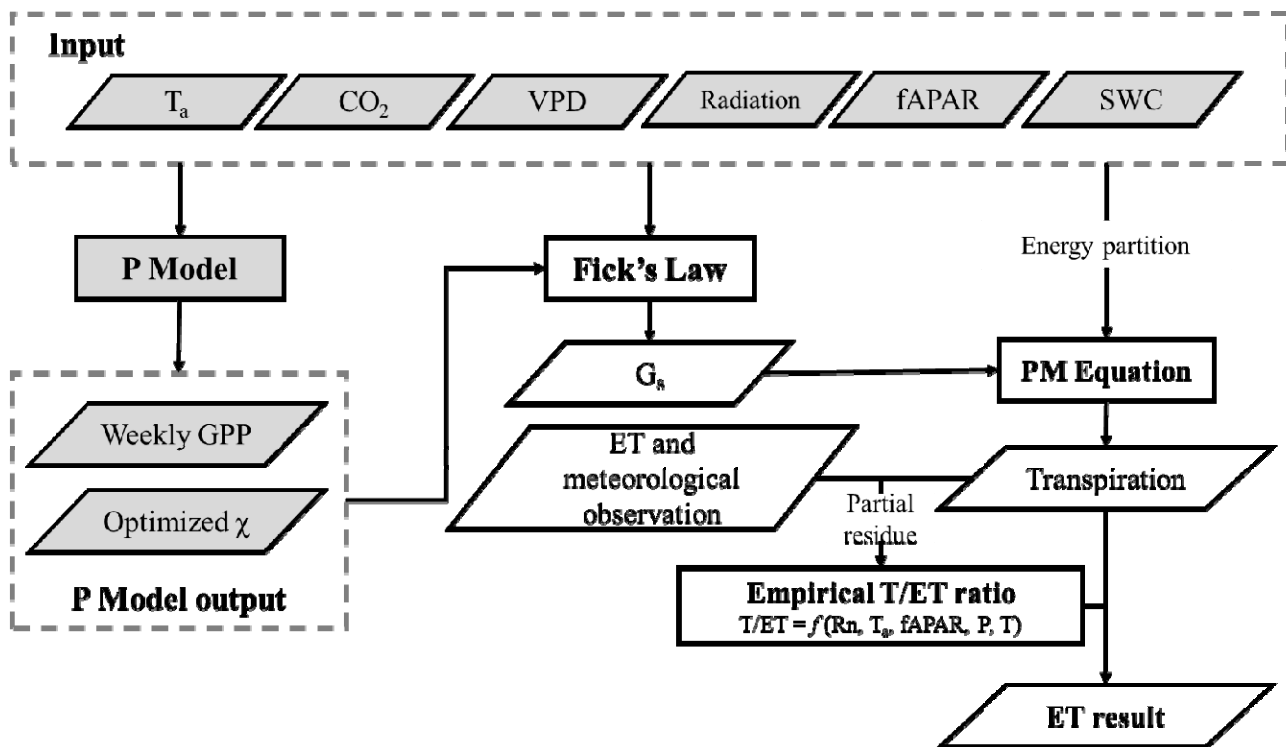

19  
 20 **Fig. 1. Flowchart of the P model based ET prediction.** Items in grey have been validated by previous  
 21 P model studies, summarized in Section 2.1.1. “Radiation” in the input block includes the four components  
 22 of net radiation (R<sub>n</sub>), and PPFD (photosynthetic photon flux density). SWC is the volumetric soil water  
 23 content, which is an input to the P model. Canopy conductance is calculated by Fick’s law, which requires

24 simulated weekly GPP and  $\chi$  (ratio of  $c_i/c_a$ ) as input. The ratio T/ET is required for calculating ET from  
25 modelled transpiration, and is fitted by ET and meteorological observation. In the empirical function,  $T_a$  is  
26 air temperature in °C, fAPAR is the fraction of absorbed photosynthetically active radiation, and P is annual  
27 precipitation in mm.

### 28 2.1.1 Predicting GPP and $\chi$ using the P model

29 The P model is an extension of the FvCB biochemical model of C<sub>3</sub> photosynthesis (Farquhar et al., 1980)  
30 to account for optimal acclimation of photosynthetic capacities and stomatal behaviour (Wang et al., 2017,  
31 Stocker et al., 2020: the reader is referred to these publications for the detailed equations and their  
32 derivation). The instantaneous rate of photosynthesis according to the FvCB model is the lesser of the  
33 electron transport-limited rate ( $A_J$ ) and the carboxylation-limited rate ( $A_C$ ). Both rates are limited by  $c_i$ , and  
34 therefore depend on the product of  $c_a$  and  $\chi$ . Based on the concept of eco-evolutionary optimality (Franklin  
35 et al., 2020), the *least-cost hypothesis* states that plants minimize the total costs of maintaining carboxylation  
36 capacity and transpiration through the regulation of stomatal conductance (Wright et al., 2003; Prentice et al.,  
37 2014). This hypothesis leads to a prediction of optimal  $\chi$  as a function of VPD, temperature and elevation  
38 (Prentice et al., 2014; Wang et al., 2017).

39 A second optimality hypothesis, the *coordination hypothesis*, states that on a weekly to monthly time  
40 scale,  $A_J$  and  $A_C$  converge (Chen et al. 1993; Haxeltine and Prentice 1996; Maire et al., 2012) by acclimation  
41 of the maximum rate of carboxylation ( $V_{cmax}$ ) (Smith et al., 2019). The maximum rate of electron transport  
42 ( $J_{max}$ ) is observed to vary in parallel to  $V_{cmax}$ . Optimal  $J_{max}$  is assumed to maximize the difference between  
43 the benefit ( $A_J$ ) and cost of maintaining a certain level of  $J_{max}$  (Wang et al., 2017; Smith et al., 2019). Wang  
44 et al. (2017) showed that the least-cost and coordination hypotheses, together with this principle for the  
45 optimization of  $J_{max}$ , lead to a closed-form expression for GPP. Despite its basis in the FvCB model of  
46 instantaneous photosynthesis (which implies a non-linear, saturating response to light), this model has the  
47 mathematical form of a light use efficiency (LUE) model: in other words, accumulated GPP for C3 plant  
48 over the acclimation time scale is proportional to accumulated absorbed photosynthetic photon flux density  
49 (PPFD).  $V_{cmax}$  and  $J_{max}$  do not have to be specified, because their optimal values are implicitly calculated by  
50 the model.

51 We modified the P model to predict  $C_4$  as well as  $C_3$  photosynthesis based on the theory by Collatz et al.,  
52 (1992). Given that phosphoenolpyruvate carboxylase (the initial carboxylating enzyme in the  $C_4$  pathway)  
53 has a higher affinity for  $CO_2$  than Rubisco (the primary carboxylating enzyme of the  $C_3$  pathway), we  
54 assumed that  $C_4$  photosynthesis is not limited by the intercellular  $CO_2$  concentration (Sayre et al., 1979). The  
55 model as applied here also includes the generic soil-moisture limitation function described by Stocker et al.  
56 (2020) and temperature dependencies of the intrinsic quantum efficiency of photosynthesis, based on  
57 measurements by Bernacchi et al. (2003) for  $C_3$  plants (Stoker et al., 2020) and Kubien et al. (2003) for  $C_4$   
58 plants (Cai & Prentice, 2020). The soil moisture function requires an estimate of a climatological aridity  
59 index, which was calculated for each site using in-situ observation and the Priestley-Taylor equation  
60 (Priestley and Taylor, 1972). The full model code is available at <https://github.com/stineb/rpmodel>.

### 31 *2.1.2 Canopy conductance*

32 The diffusion of both water vapour and  $CO_2$  through stomata can be described by Fick's law.  $CO_2$   
33 diffusion into the leaf is driven by the difference between the ambient and leaf-internal concentrations. We  
34 scale up from leaf to canopy level in the simplest possible way via the “big-leaf” approximation. Thus,  
35 canopy stomatal conductance to water vapour is given by:

$$36 \quad G_s = 1.6 \frac{GPP}{c_a(1-\chi)} \quad (1)$$

37 where the factor 1.6 is the ratio of the molecular diffusivities of water and  $CO_2$ . For  $C_4$  plants, we set  $\chi$  in  
38 equation (1) to a typical value of 0.45 (Farquhar et al., 1989).

### 39 *2.1.3 Transpiration*

70 Total latent heat flux ( $\lambda E_t$ ) can then be decomposed into contributions from transpiration ( $\lambda E_c$ ) and  
71 evaporation ( $\lambda E$ ):

$$72 \quad \lambda E_t = \lambda E_c + \lambda E \quad (2)$$

73 where  $\lambda$  is the latent heat of evaporation of water ( $MJ \text{ kg}^{-1}$ ).  $\lambda E_c$  was calculated using the  
74 Penman-Monteith equation:

$$75 \quad \lambda E_c = \frac{\Delta Q_{n,c} + \rho c_p VPD g_a}{\Delta + \gamma(1 + g_a/G_s)} \quad (3)$$

76 where  $\Delta$  is the slope of the curve relating saturation water vapour pressure to air temperature ( $\text{kPa K}^{-1}$ ) and  
77  $Q_{n,c}$  is the available energy (net radiation) intercepted by the canopy ( $\text{W m}^{-2}$ ), i.e., a fraction of the total net  
78 radiation minus soil heat flux ( $R_n - G$ ). Because shortwave radiation is generally the largest part of net  
79 radiation, this fraction was estimated by Beer's Law as  $Q_{n,c}/Q_n = 1 - \exp(-k LAI)$ , where  $k$  is the  
30 extinction coefficient, assumed constant at 0.5. This has a similar mathematical form to the calculation of  
31 fAPAR from LAI (leaf area index) (Gan et al., 2018; Zhang et al., 2019).  $\rho$  in equation (3) is the density of  
32 air ( $\text{kg m}^{-3}$ ),  $c_p$  is the heat capacity of dry air ( $\text{J kg}^{-1} \text{K}^{-1}$ ),  $G_s$  is calculated by equation (1), and  $g_a$  is the  
33 aerodynamic conductance calculated by the simple model of Thom (1972):

$$34 \quad 1/g_a = \frac{u}{u_*^2} + 135u_*^{-0.67} \quad (4)$$

35 where  $u$  is the wind speed ( $\text{m s}^{-1}$ ) and  $u_*$  ( $\text{m s}^{-1}$ ) is the friction velocity, which is obtained from flux  
36 observations. The even simpler equation recommended by FAO (Allen et al., 1998) was used when no  
37 information on  $u_*$  was available:

$$38 \quad 1/g_a = 208/u \quad (5)$$

#### 39 *2.1.4 Site-specific ratio of transpiration to total evapotranspiration*

40 Fatichi et al. (2017) used a detailed, mechanistic ecosystem model that simultaneously solves for water,  
31 energy, and carbon exchanges over the land surface to analyse global variation in simulated T/ET. Their  
32 results suggested that T/ET is globally constrained to  $70 \pm 9\%$  with only modest effects of climate or  
33 vegetation type – although under some extreme conditions, such as drip-irrigated farmland, the ratio could  
34 lie outside this range (Kool et al., 2014). Here we assumed a constant T/ET ratio at each site, and estimated  
35 this ratio using a priori relationship between modelled transpiration as described above (equations 1–5) and  
36 the observed ET and meteorological conditions.

37 We then estimated partial effects (effects of each predictor variable with the others held constant at their  
38 median values) in a multiple regression to analyse how T/ET ratio varies with environment. Five indicators  
39 ( $R_n$ , fAPAR,  $T_a$ ,  $P$ , and modelled transpiration) were selected as potential predictors. The first four of these  
40 indicators are the inputs to the empirical soil evaporation model of Zhang et al. (2010). Transpiration was



31 selected to describe the contribution of environmental water supply, since soil water content information is  
32 not available at all flux sites.

### 33 2.2 Sites and in situ observations

34 Twenty sites with 228 observation-years of flux data (including sensible heat flux, latent heat flux and  
35 soil heat flux) from the FLUXNET2015 Tier 1 data (<https://fluxnet.fluxdata.org>) were used. We employed a  
36 site selection criterion that the energy balance ratio  $(R_n - G)/(R_n + H)$  must lie between 0.8 to 1.2 (where  
37  $H$  represents sensible heat flux). These sites span eight main land cover types (Table 1, Fig. 2). Weekly  
38 measurements of  $T_a$ , wind speed, the four components of radiation (downward and upward long-wave and  
39 short-wave radiation), soil water content and ambient  $\text{CO}_2$  concentration are recorded at all these sites, and  
40 were used to drive the P model. Daily ecosystem carbon exchange was partitioned into GPP and ecosystem  
41 respiration using the half-hourly night-time separation method of Reichstein et al. (2005). Unreliable records  
42 were filtered out before weekly averaging by imposing the following requirements: (1) available energy (net  
43 radiation minus soil heat flux)  $> 0$ , which is a pre-requisite for evapotranspiration; (2) average air  
44 temperature  $> 5^\circ\text{C}$  and GPP  $> 0$ ; (3) precipitation = 0; (4) LAI  $> 0$ ; (5) less than 10% fAPAR is ineffective in  
45 the focused year (e.g. GF-Guy in 2014 was heavily contaminated by cloud).

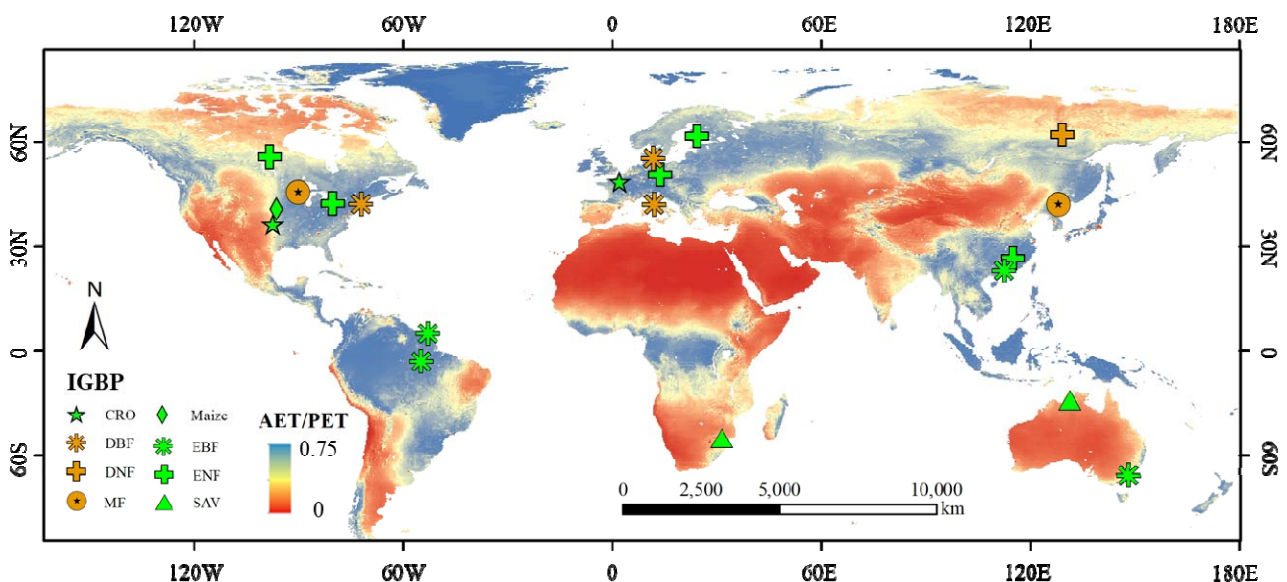

16

17 **Fig. 2. Map of flux sites.** Twenty sites from eight major biomes, according to the International  
18 Geosphere-Biosphere Programme (IGBP) classification. **CRO** = crop, **DBF** = deciduous broadleaf forests,

19 **DNF** = deciduous needleleaf forests, **MF** = mixed forests, **EBF** = evergreen broadleaf forests, **ENF** =  
20 evergreen needleleaf forests, **SAV** = savanna, **MAI** = maize. The map background is averaged ratio of mean  
21 ratio of actual evapotranspiration (AET) dividing potential evapotranspiration (PET) through the year of  
22 1990 to 2015 from GLDAS (Global Land Data Assimilation System, v2.1) (Rodell et al., 2004).

3 **Table 1.** Information on the selected flux sites. **Lon** = longitude (°), **Lat** = latitude (°), **Ele** = elevation (m). **MAT** = mean annual temperature (°C), **MAP** =  
 4 mean annual precipitation (mm). Biome type codes are the same as in Fig. 2.

| <b>D</b> | <b>Site Name</b> | <b>L on</b> | <b>L at</b> | <b>E le</b> | <b>I GBP</b> | <b>Data Range</b> | <b>M AT</b> | <b>M AP</b> |
|----------|------------------|-------------|-------------|-------------|--------------|-------------------|-------------|-------------|
|          | AU-D             | 13          | -1          | 4           | S            | 2008-2            | 2           | 9           |
|          | as               | 1.39        | 4.16        | 70          | AV           | 014               | 7.2         | 76          |
|          | AU-T             | 14          | -3          | 1           | E            | 2001-2            | 1           | 1           |
|          | um               | 8.15        | 5.66        | 200         | BF           | 014               | 0.7         | 159         |
|          | BR-S             | -5          | -3          | 1           | E            | 2000-2            | 2           | 2           |
|          | a3               | 4.97        | .02         | 00          | BF           | 004               | 6.1         | 043         |
|          | CA-M             | -9          | 5           | 2           | E            | 1994-2            | -           | 5           |
|          | an               | 8.48        | 5.88        | 59          | NF           | 008               | 3.2         | 20          |
|          | CA-T             | -8          | 4           | 1           | E            | 2009-2            |             | 1           |
|          | p3               | 0.35        | 2.71        | 84          | NF           | 014               | 8           | 036         |
|          | CN-C             | 12          | 4           | 7           | M            | 2003-2            | 2           | 6           |
|          | ha               | 8.1         | 2.4         | 66          | F            | 005               | .2          | 64          |
|          | CN-D             | 11          | 2           | 3           | E            | 2003-2            | 1           | 1           |
|          | in               | 2.54        | 3.17        | 08          | BF           | 005               | 9.6         | 618         |
|          | CN-Q             | 11          | 2           | 1           | E            | 2003-2            | 1           | 1           |
|          | ia               | 5.06        | 6.74        | 09          | NF           | 005               | 9           | 467         |
|          | DE-T             | 13          | 5           | 3           | E            | 1996-2            | 8           | 8           |
|          | ha               | .57         | 0.96        | 85          | NF           | 014               | .2          | 43          |
| 0        | DK-S             | 11          | 5           | 4           | D            | 1996-2            | 8           | 6           |
|          | or               | .64         | 5.49        | 0           | BF           | 014               | .2          | 60          |
| 1        | FI-Hy            | 24          | 6           | 1           | E            | 1996-2            | 3           | 7           |
|          | y                | .29         | 1.85        | 81          | NF           | 014               | .8          | 09          |
|          | FR-Gr            | 1.          | 4           | 1           | C            | 2004-2            | 1           | 6           |

|   |       |      |      |    |    |        |     |     |
|---|-------|------|------|----|----|--------|-----|-----|
| 2 | i     | 95   | 8.84 | 25 | RO | 014    | 2   | 50  |
|   | GF-G  | -5   | 5.   | 4  | E  | 2004-2 | 2   | 3   |
| 3 | uy    | 2.92 | 28   | 8  | BF | 014    | 5.7 | 041 |
|   | IT-Ro | 11   | 4    | 1  | D  | 2002-2 | 1   | 8   |
| 4 | 2     | .92  | 2.39 | 60 | BF | 012    | 5.2 | 76  |
|   | RU-S  | 12   | 6    | 2  | D  | 2012-2 | -   | 2   |
| 5 | kp    | 9.17 | 2.26 | 46 | NF | 014    | 1.1 | 90  |
|   | US-A  | -9   | 3    | 3  | C  | 2003-2 | 1   | 8   |
| 6 | rm    | 7.49 | 6.61 | 14 | RO | 012    | 4.8 | 43  |
|   | US-H  | -7   | 4    | 3  | D  | 1991-2 | 6   | 1   |
| 7 | a1    | 2.17 | 2.54 | 40 | BF | 012    | .6  | 071 |
|   | US-N  | -9   | 4    | 3  | M  | 2001-2 | 1   | 7   |
| 8 | e1    | 6.48 | 1.17 | 61 | AI | 013    | 0.1 | 90  |
|   | US-P  | -9   | 4    | 4  | M  | 1995-2 | 4   | 8   |
| 9 | Fa    | 0.27 | 5.95 | 72 | F  | 014    | .3  | 23  |
|   | ZA-K  | 31   | -2   | 3  | S  | 2000-2 | 2   | 5   |
| 0 | ru    | .5   | 5.02 | 59 | AV | 013    | 1.9 | 47  |

## 25 2.3 Remote sensing observations

26 Remotely sensed fAPAR is required as an input by the P model. Since some of the flux records started  
27 in the early 1990s, we used the fAPAR product from NOAA CDR AVHRR with a  $0.05^\circ$  spatial resolution in  
28 order to maintain consistency of the model input (Claverie and Vermote, 2014). fAPAR time series were  
29 smoothed by a Savitzky–Golay filter to eliminate high-frequency noise (Chen et al., 2004).

## 30 3 Results

### 31 3.1 Predicting weekly GPP using the P model

32 Weekly predicted GPP was well supported by observations (Fig. 3 and Table 2). The correlation  
33 coefficient ( $r$ ) based on all records was 0.81, the RMSE (root mean squared error) is 18.7 gC/week, and the  
34 NSE (Nash-Sutcliffe efficiency coefficient) is 0.61. At site scale,  $r$  ranged from 0.48 (at BR-Sa3) to 0.92 (at  
35 CN-Cha), and RMSE from 6.2 gC/week (at RU-Skp) to 24.8 gC/week (at US-Ne1). This good performance  
36 is consistent with previous P model evaluation studies (Wang et al., 2017; Stocker et al., 2018, 2020; Qiao et  
37 al., 2020). The good performance at the maize site (US-Ne1) supports its extension to  $C_4$  vegetation (RMSE  
38 = 24.8 gC/week, and a 24.5% of relative root mean squared error, denoted as RRMSE). The model tends to  
39 slightly underestimate GPP (fitting slope is 0.81); this bias can be removed by calibrating a single, global  
40 parameter representing the efficacy with which absorbed light is used in photosynthesis (Stocker et al.,  
41 2020), but we did not apply any such *a posteriori* adjustment. The underestimation is probably due at least  
42 in part to mismatches of the flux tower footprints with the AVHRR fAPAR grids (Kljun et al., 2015).  
43 Heterogeneity inside the target RS pixel ( $0.05^\circ \times 0.05^\circ$ ), but not in the tower footprint, especially patches of  
44 bare soil, would be expected to reduce the measured fAPAR by increasing reflectance in the red band,  
45 leading to an underestimation of absorbed radiation.

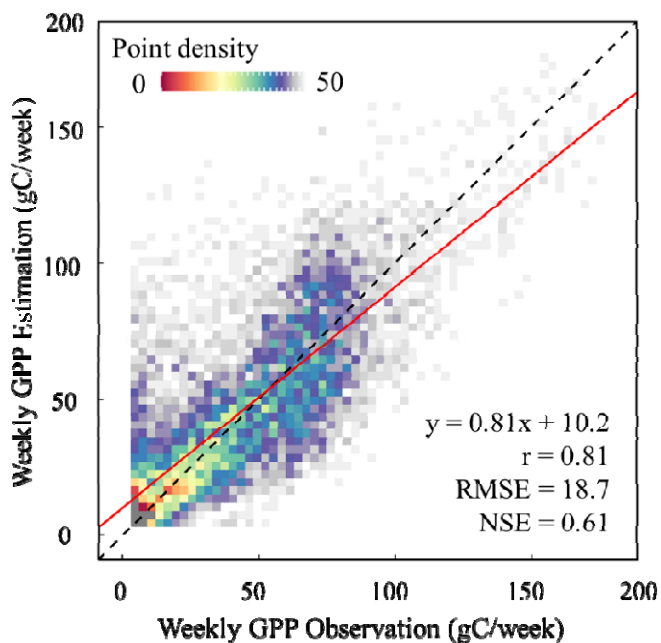

16

17 **Fig. 3. Comparison of estimated GPP against observations at a weekly time scale.** The red line is  
 18 the linear fit; the dashed line is the 1:1 line. Colours represents the density of points.

19 **Table 2. Statistical information on the GPP evaluations on a weekly timestep.** Slope: coefficients of  
 20 linear fits,  $r$ : correlations between observed and predicted values, RMSE: root mean squared error of  
 21 prediction, RRMSE: relative root mean squared error.

| Site Name | GPP estimation result |                 |           |
|-----------|-----------------------|-----------------|-----------|
|           | $r$                   | RMSE (g C/week) | RRMSE (%) |
| AU-Das    | 0.75                  | 7.4             | 23.5      |
| AU-Tum    | 0.59                  | 16.1            | 26.6      |
| BR-Sa3    | 0.48                  | 15.8            | 25.0      |
| CA-Man    | 0.77                  | 10.3            | 34.7      |
| CA-TP3    | 0.61                  | 20.3            | 44.1      |
| CN-Cha    | 0.92                  | 9.2             | 16.4      |
| CN-Din    | 0.78                  | 7.8             | 25.0      |
| CN-Qia    | 0.87                  | 8.2             | 21.6      |
| DE-Tha    | 0.75                  | 14.6            | 28.4      |
| DK-Sor    | 0.89                  | 16.1            | 24.2      |
| FI-Hyy    | 0.89                  | 11.7            | 27.4      |
| FR-Gri    | 0.61                  | 25.3            | 34.4      |
| GF-Guy    | 0.49                  | 24.1            | 33.3      |
| IT-Ro2    | 0.63                  | 16.9            | 34.9      |
| RU-Skp    | 0.82                  | 6.2             | 24.6      |
| US-Arm    | 0.68                  | 7.7             | 22.8      |
| US-Ha1    | 0.84                  | 19.3            | 33.0      |

|        |      |      |      |
|--------|------|------|------|
| US-Ne1 | 0.86 | 24.8 | 24.5 |
| US-PFa | 0.88 | 8.5  | 20.7 |
| ZA-Kru | 0.65 | 9.3  | 24.2 |

### 52 3.2 Estimating T/ET ratio

53 The fitted slope in Table 3 indicates that the ratio T/ET ranged from 0.52 (FR-Gri) to 0.92 (CA-Man).  
 54 The five selected predictors of this ratio (net radiation, fAPAR, precipitation, air temperature and modelled  
 55 transpiration) all contributed significantly to determine T/ET ( $p < 0.05$ ; see Fig. 4). T/ET increased with net  
 56 radiation, precipitation and fAPAR and decreased with air temperature and transpiration. According to the  
 57 theory of Zhang et al. (2010), higher fAPAR leads to greater energy interception by the canopy and therefore  
 58 a higher T/ET. More energy (higher  $R_n$  and  $T_a$ ) and precipitation should, all else equal, lead to a denser  
 59 canopy and thus larger fAPAR. But increasing temperature increases soil evaporation more than  
 60 transpiration. The net effect of  $T_a$  on T/ET ratio is therefore negative (Fig. 4d). As T increases, T/ET  
 61 decreases. This negative effect (Fig. 4e) suggests that soil evaporation is more sensitive to changing energy  
 62 inputs, due to the limitation of transpiration by stomata.

63 We estimated T/ET ratio at site level using the empirical relationship between the T/ET and the five  
 64 variables using the following relationship:

$$65 \quad T/ET = 4.05 \times 10^{-3}R_n + 7.94 \times 10^{-5}P + 0.56 \times fAPAR - 0.0014 \times T_a - 0.19 \times T + 0.37 \quad (6)$$

66 The correlation coefficient of the model against fitted (linear regressed by modelled T against ET  
 67 observation) T/ET ratio was 0.84 based on site-average conditions (see Fig. 5). Analysis of the dependencies  
 68 of this estimated ratio on several predictor variables suggested that denser canopies significantly lead to  
 69 higher values of T/ET, as also suggested by Wang et al. (2014). Results of cross-validation (at each target  
 70 site re-fitting the relationship using data from other sites, then using the new function to estimate ET at the  
 71 target site, see Fig. S1) indicate the robustness and reliability of this approach at different sites.

72 **Table 3. Statistical information on the ET evaluations on a weekly timestep.** Slope in table  
 73 represents linear fitting slope of estimated transpiration to ET observation, which is considered as the T/ET  
 74 ratio. Other items have the same meaning with its in Table 2.

| Site Name | ET estimation result |   |           |
|-----------|----------------------|---|-----------|
|           | Slope                | r | RRMSE (%) |
|           |                      |   |           |

|        |      |          |     |      |
|--------|------|----------|-----|------|
| AU-Das | 0.56 | 0.8<br>2 | 4.4 | 29.5 |
| AU-Tum | 0.81 | 0.8<br>1 | 5.7 | 21.5 |
| BR-Sa3 | 0.62 | 0.8<br>5 | 2.5 | 9.9  |
| CA-Man | 0.92 | 0.8<br>9 | 4.3 | 41.3 |
| CA-TP3 | 0.78 | 0.7<br>3 | 4.7 | 28.1 |
| CN-Cha | 0.67 | 0.9<br>5 | 2.7 | 18.6 |
| CN-Din | 0.68 | 0.8<br>4 | 4.8 | 39.9 |
| CN-Qia | 0.65 | 0.9<br>0 | 4.9 | 36.7 |
| DE-Tha | 0.84 | 0.7<br>4 | 5.3 | 41.3 |
| DK-Sor | 0.52 | 0.8<br>7 | 3.7 | 23.3 |
| FI-Hyy | 0.86 | 0.8<br>8 | 3.9 | 29.3 |
| FR-Gri | 0.52 | 0.8<br>2 | 4.4 | 32.8 |
| GF-Guy | 0.62 | 0.5<br>1 | 4.8 | 16.6 |
| IT-Ro2 | 0.74 | 0.8<br>7 | 5.4 | 41.8 |
| RU-Skp | 0.71 | 0.6<br>6 | 4.1 | 36.0 |
| US-Arm | 0.54 | 0.7<br>1 | 4.8 | 42.8 |
| US-Ha1 | 0.84 | 0.8<br>5 | 5.7 | 37.2 |
| US-Ne1 | 0.62 | 0.9<br>1 | 5.0 | 26.1 |
| US-PFa | 0.79 | 0.9<br>3 | 3.1 | 22.7 |
| ZA-Kru | 0.68 | 0.7<br>7 | 5.5 | 38.8 |



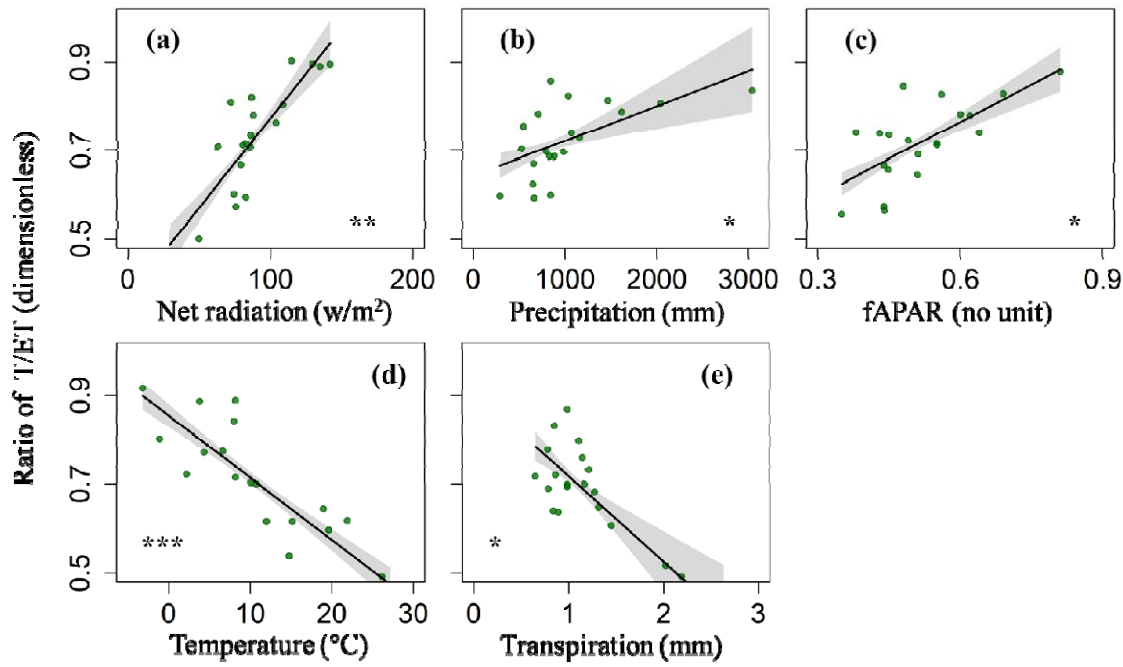

76

77

78

79

30

31

32

**Fig. 4. Partial residual plots from the regression of site-scale transpiration to evapotranspiration ratio (T/ET) against environmental predictors.** Net radiation, fAPAR, air temperature and modelled transpiration are averaged by effective observation during growing season at each site, except precipitation (mm) in (b) which is an annual accumulated total. Radiation ( $W/m^2$ ) in (a) represents net radiation. Grey colours in all panels represents 95% confidence intervals. Significance: \*\*\*  $p < 0.001$ , \*\*  $p < 0.01$ , \*  $p < 0.05$ .

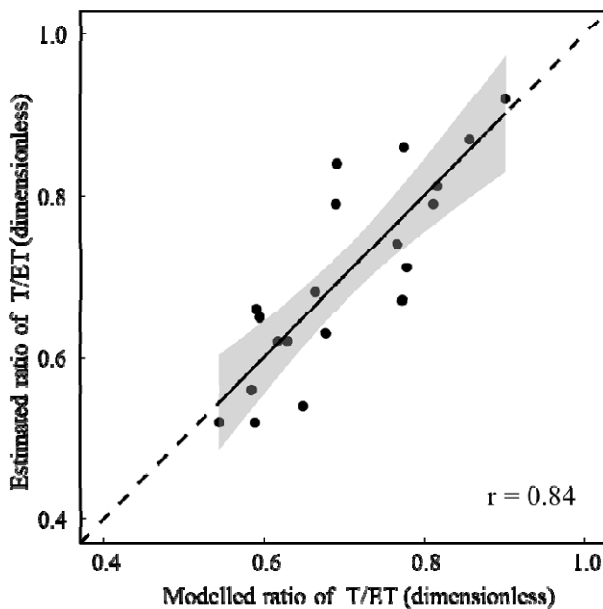

33

34 **Fig. 5. Comparison of predicted and modelled (linear regressed by modelled T against ET**  
35 **observation) T/ET ratio at each flux sites.** The predictions are based on the empirical environmental  
36 dependences. Grey colour represents 95% confidence intervals; the dashed line is the 1:1 line.

### 37 3.3 Performance of ET estimation

38 We obtained a good validation result of modelled ET against flux observations (slope = 0.92,  $r = 0.85$ ,  
39 RMSE = 5.46 mm week<sup>-1</sup> and NSE = 0.66, see Fig. 6). Good performance of the model was also shown by  
30 correlation at site level ( $r$  ranges from 0.51 to 0.95), and RMSE (from 2.50 to 5.71 mm week<sup>-1</sup>).

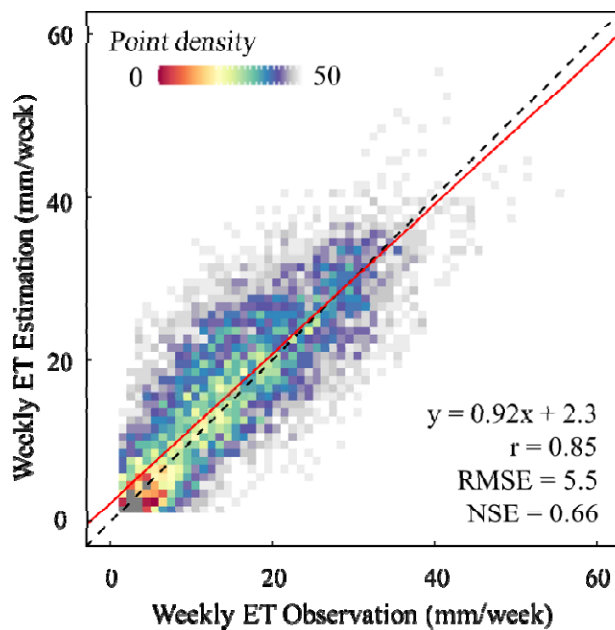

31

32 **Fig. 6. Comparison of estimated ET using the approach in this study against observation with**  
33 **weekly time scale.** The red line is the linear fit; the dashed line is the 1:1 line. Colours represents the density  
34 of points.

### 35 4 Discussion

36 We have demonstrated an approach to estimate evapotranspiration that greatly reduces the need to  
37 specify uncertain parameters. It points the way towards a parsimonious general theory of ET estimation from  
38 remotely sensed observations and environmental variables. The improvement also avoids discontinuities due

39 to the need to impose biome boundaries when biome-specific parameters are required. This approach, based  
40 in part on optimality theory, could provide a means to improve the monitoring and forecasting of ET.

#### 41 *4.1 Success of the a priori method*

42 In our framework, GPP and ET are estimated without the need to estimate or calibrate biome or plant  
43 functional type specific parameters. The imposition of biome boundaries, required by many existing  
44 methods, creates uncertainty for two reasons. First is the quality of terrestrial classification. Remotely sensed  
45 classification maps always have reasonable accuracy for types with clear spatial or temporal pattern, but  
46 there are still uncertainties, especially in wet regions with major cloud contamination (Zhang et al., 2018).  
47 Incorrect biome identification would influence the parameters and thus the results (see the example Fig. S2).  
48 In addition, separate parameter fitting by biomes can obscure systematic differences among modelled  
49 responses to environment (see Fig. S3). The P model, in contrast, is based on a universal plant optimality  
50 theory that implicitly predicts differences among biomes as a consequence of the environments where they  
51 occur.

#### 12 *4.2 Uncertainties*

13 The P model provides a universal strategy to calculate canopy conductance in C<sub>3</sub> vegetation and is  
14 extended to C<sub>4</sub> plants in a straightforward way. The good results at the maize site US-Ne1 support this  
15 approach. The current version however adopts a constant value of 0.45 for  $\chi$  in C<sub>4</sub> plants (Farquhar et al.,  
16 1989), a simplification that could be improved on.

17 The conversion from transpiration to total evapotranspiration is based on a T/ET ratio, which was  
18 considered as a constant at each site. In Fig. S4, we tested this assumption by constructing a global map of  
19 the standard deviation of the annual T/ET ratio in the PMLv2 (Penman-Monteith-Leuning) data set from  
20 2003 to 2017 (Zhang et al., 2019). PML was chosen because its strategy for partitioning available energy in  
21 the PM equation is the same as the one we used. Most of the region (nearly 80%) has a T/ET standard  
22 deviation < 0.05 over these 15 years. Less than 1% of the area has a standard deviation > 0.1. In addition,  
23 since the energy intercepted by canopy is calculated by fAPAR, area with significant variation of T/ET are  
24 mainly located in the region with a significant variation in terrestrial LAI, both greening and browning, as  
25 shown by Zhu et al., (2016).

26 A comparison with global patterns in other global T/ET products, including PML and GLEAM, shows  
27 that the three remote-sensing based T/ET estimates yield similar latitudinal profiles (see Fig. S5). However,  
28 the averaged value in PML (0.46) is substantially lower than in GLEAM (0.62) and our empirical method  
29 (0.68). In regions with extremely sparse vegetation, such as North Africa and the Tibetan plateau (about 0.3  
30 by our method, compared with near-zero in GLEAM and no value given in PML), we overestimated T/ET.  
31 There are two possible reasons for this. First, fAPAR has a paramount contribution to our prediction, which  
32 responds to the low fAPAR in such regions. Second, we employed only 20 sites during the fitting, and none  
33 of them were from arid regions, so there is a possibility of bias.

34 Comparisons in this study (Fig. S6) and Gu et al., (2018) point to large difference between products and  
35 estimation strategies for T/ET. Large differences have also been reported in ESMs (Lian et al., 2018). We  
36 hope to improve the performance and temporal resolution of T/ET modelling with the help of multiple  
37 observation strategies in near future. Possible more explicitly process-based approaches to modelling the  
38 non-T components of ET include the flux variance similarity (FVS) partitioning method proposed by  
39 Scanlon and Sahu (2008), and the use of data from lysimeters and sap flow meters (Zhou et al., 2018,  
40 Nelson et al., 2020).

41 The scientific advance presented here lends itself naturally to application with remote sensing  
42 technology. The only satellite-derived input is fAPAR, here at 5 km spatial resolution – but this implies a  
43 mismatch with the flux tower footprints that may explain the underestimation of GPP at some sites.  
44 Although this underestimation is corrected automatically in the process of estimating T/ET ratios, it would  
45 be desirable to reduce it by using remotely sensed input with finer spatial resolution, such as images from  
46 MODIS (MOderate Resolution Imaging Spectroradiometer), to better fit the tower footprint. There is also  
47 the potential to improve the accuracy of fAPAR estimation from satellites. For example, according to Zhang  
48 et al. (2020), light absorbed by chlorophyll (Chl) should provide a better basis for the estimation of GPP; a  
49 variety of indices that more accurately represent Chl absorption are becoming available. Moreover, ET could  
50 usefully be mapped with, say, 30 m or finer spatial resolution, as climate variables tend to vary much more  
51 smoothly than vegetation properties (Tan et al., 2019). An improved, high-resolution satellite-based ET  
52 estimation strategy would have many applications in land-surface modelling and water resources research.

### 53 *Acknowledgements*

54 This research was supported by the National Key R&D Program of China (no. 2018YFA0605400), the  
55 National Natural Science Foundation of China (grant no. 91837312, 42001356) and the generosity of Eric  
56 and Wendy Schmidt by recommendation of the Schmidt Futures program. This research contributes to the  
57 Imperial College initiative on Grand Challenges in Ecosystems and the Environment. ICP's contribution has  
58 been supported by the European Research Council (ERC) under the European Union's Horizon 2020  
59 research and innovation programme (grant agreement No: 787203 REALM). We used 'free and fair use'  
60 eddy-covariance data acquired by the FLUXNET community and, in particular, by the following networks:  
61 AmeriFlux, ChinaFlux, OzFlux, CarboEuropeIP and TCOS-Siberia. We acknowledge the financial support  
62 to the eddy-covariance data harmonization provided by University of Western Australia, Charles Darwin  
63 University, CSIRO, University of California – Irvine, University of Manitoba, McMaster University,  
64 IGSNRR-, SCIB- and IAE- Chinese Academy of Sciences, Technical University of Denmark, University of  
65 Heisinki, INRA Grignon, INRA, University of Tuscia Viterbo, IBPC Russia, Lawrence Berkeley National  
66 Laboratory, Harvard University, University of Nebraska- Lincoln, University of Wisconsin and University of  
67 the Witwatersrand.

38 **References**

- 39 Allen R G, Pereira L S, Raes D, et al. Crop evapotranspiration-Guidelines for computing crop water  
70 requirements-FAO Irrigation and drainage paper 56[J]. Fao, Rome, 1998, 300(9): D05109.
- 71 Bai P, Liu X. Intercomparison and evaluation of three global high-resolution evapotranspiration products  
72 across China[J]. Journal of hydrology, 2018, 566: 743-755.
- 73 Ball J T, Woodrow I E, Berry J A. A model predicting stomatal conductance and its contribution to the  
74 control of photosynthesis under different environmental conditions[M]//Progress in photosynthesis  
75 research. Springer, Dordrecht, 1987: 221-224.
- 76 Bernacchi C J, Bagley J E, Serbin S P, et al. Modelling C 3 photosynthesis from the chloroplast to the  
77 ecosystem[J]. Plant, Cell & Environment, 2013, 36(9): 1641-1657.
- 78 Bastiaanssen W G M, Menenti M, Feddes R A, et al. A remote sensing surface energy balance algorithm for  
79 land (SEBAL). 1. Formulation[J]. Journal of hydrology, 1998, 212: 198-212.
- 30 Bastiaanssen W G M, Molden D J, Makin I W. Remote sensing for irrigated agriculture: examples from  
31 research and possible applications[J]. Agricultural water management, 2000, 46(2): 137-155.
- 32 Cai W, Prentice I C. Recent trends in gross primary production and their drivers: analysis and modelling at  
33 flux-site and global scales[J]. Environmental Research Letters, 2020.
- 34 Carlson T N. Modeling stomatal resistance: an overview of the 1989 workshop at the Pennsylvania State  
35 University[J]. Agricultural and Forest Meteorology, 1991, 54(2-4): 103-106.
- 36 Chen J L, Reynolds J F, Harley P C, et al. Coordination theory of leaf nitrogen distribution in a canopy[J].  
37 Oecologia, 1993, 93(1): 63-69.
- 38 Chen J, Jönsson P, Tamura M, et al. A simple method for reconstructing a high-quality NDVI time-series  
39 data set based on the Savitzky–Golay filter[J]. Remote sensing of Environment, 2004, 91(3-4): 332-344.
- 30 Cheng L, Zhang L, Wang Y P, et al. Recent increases in terrestrial carbon uptake at little cost to the water  
31 cycle[J]. Nature Communications, 2017, 8(1): 1-10.

- 32 Claverie M, Vermote E. NOAA Climate Data Record (CDR) of Leaf Area Index (LAI) and Fraction of  
33 Absorbed Photosynthetically Active Radiation (FAPAR) Version 4[J]. NOAA National Centers for  
34 Environmental Information, 2014.
- 35 Cleugh H A, Leuning R, Mu Q, et al. Regional evaporation estimates from flux tower and MODIS satellite  
36 data[J]. *Remote Sensing of Environment*, 2007, 106(3): 285-304.
- 37 Collatz G J, Ribas-Carbo M, Berry J A. Coupled photosynthesis-stomatal conductance model for leaves of  
38 C4 plants[J]. *Functional Plant Biology*, 1992, 19(5): 519-538.
- 39 Cowan I R, Farquhar G D, Stomatal function in relation to leaf metabolism and environment[J]. 1977.
- 40 Elnashar A, Wang L, Wu B, et al. Synthesis of global actual evapotranspiration from 1982 to 2019[J]. *Earth*  
41 *System Science Data*, 2021, 13(2): 447-480.
- 42 Ershadi A, McCabe M F, Evans J P, et al. Multi-site evaluation of terrestrial evaporation models using  
43 FLUXNET data[J]. *Agricultural and Forest Meteorology*, 2014, 187: 46-61.
- 44 Farquhar G D, von Caemmerer S, Berry J A. A biochemical model of photosynthetic CO<sub>2</sub> assimilation in  
45 leaves of C<sub>3</sub> species[J]. *Planta*, 1980, 149(1): 78-90.
- 46 Farquhar G D, Ehleringer J R, Hubick K T. Carbon isotope discrimination and photosynthesis[J]. *Annual*  
47 *review of plant biology*, 1989, 40(1): 503-537.
- 48 Fatichi S, Pappas C. Constrained variability of modeled T: ET ratio across biomes[J]. *Geophysical Research*  
49 *Letters*, 2017, 44(13): 6795-6803.
- 10 Fisher J B, Melton F, Middleton E, et al. The future of evapotranspiration: Global requirements for  
11 ecosystem functioning, carbon and climate feedbacks, agricultural management, and water resources[J].  
12 *Water Resources Research*, 2017, 53(4): 2618-2626.
- 13 Franklin O, Harrison S P, Dewar R, et al. Organizing principles for vegetation dynamics[J]. *Nature plants*,  
14 2020: 1-10.

- 15 Gallego-Sala A V, Charman D J, Brewer S, et al. Latitudinal limits to the predicted increase of the peatland  
16 carbon sink with warming[J]. *Nature climate change*, 2018, 8(10): 907-913.
- 17 Gan R, Zhang Y, Shi H, et al. Use of satellite leaf area index estimating evapotranspiration and gross  
18 assimilation for Australian ecosystems[J]. *Ecohydrology*, 2018, 11(5): e1974.
- 19 Gitelson A A, Arkebauer T J, Suyker A E. Convergence of daily light use efficiency in irrigated and rainfed  
20 C3 and C4 crops[J]. *Remote sensing of environment*, 2018, 217: 30-37.
- 21 Granger R J, Gray D M. Evaporation from natural non saturated surfaces[J]. *J. Hydrol*, 1989, 11121: 29.
- 22 Gu C, Ma J, Zhu G, et al. Partitioning evapotranspiration using an optimized satellite-based ET model across  
23 biomes[J]. *Agricultural and forest meteorology*, 2018, 259: 355-363.
- 24 Haxeltine, A. & Prentice, I.C. (1996). A general model for the light-use efficiency of primary production.  
25 *Functional Ecology*, 10, 551-561.
- 26 He L, Chen J M, Gonsamo A, et al. Changes in the shadow: the shifting role of shaded leaves in global  
27 carbon and water cycles under climate change[J]. *Geophysical Research Letters*, 2018, 45(10):  
28 5052-5061.
- 29 Jarvis P G. The interpretation of the variations in leaf water potential and stomatal conductance found in  
30 canopies in the field[J]. *Philosophical Transactions of the Royal Society of London. B, Biological*  
31 *Sciences*, 1976, 273(927): 593-610.
- 32 Jiang C, Ryu Y. Multi-scale evaluation of global gross primary productivity and evapotranspiration products  
33 derived from Breathing Earth System Simulator (BESS)[J]. *Remote Sensing of Environment*, 2016, 186:  
34 528-547.
- 35 Jung M, Reichstein M, Bondeau A. Towards global empirical upscaling of FLUXNET eddy covariance  
36 observations: validation of a model tree ensemble approach using a biosphere model[J]. 2009.
- 37 Kljun N, Calanca P, Rotach M W, et al. A simple two-dimensional parameterisation for Flux Footprint  
38 Prediction (FFP)[J]. *Geoscientific Model Development*, 2015, 8(11): 3695.



- 39 Knauer J, Zaehle S, Medlyn B E, et al. Towards physiologically meaningful water use efficiency estimates  
40 from eddy covariance data[J]. *Global Change Biology*, 2018, 24(2): 694-710.
- 41 Kool D, Agam N, Lazarovitch N, et al. A review of approaches for evapotranspiration partitioning[J].  
42 *Agricultural and forest meteorology*, 2014, 184: 56-70.
- 43 Kowalczyk E A, Wang Y P, Law R M, et al. The CSIRO Atmosphere Biosphere Land Exchange (CABLE)  
44 model for use in climate models and as an offline model[J]. *CSIRO Marine and Atmospheric Research*  
45 *Paper*, 2006, 13: 42.
- 46 Kubien D S, von Caemmerer S, Furbank R T, et al. C<sub>4</sub> photosynthesis at low temperature. A study using  
47 transgenic plants with reduced amounts of Rubisco[J]. *Plant Physiology*, 2003, 132(3): 1577-1585.
- 48 Lagouarde J P. Use of NOAA AVHRR data combined with an agrometeorological model for evaporation  
49 mapping[J]. *International Journal of Remote Sensing*, 1991, 12(9): 1853-1864.
- 50 Leuning R. A critical appraisal of a combined stomatal photosynthesis model for C<sub>3</sub> plants[J]. *Plant, Cell &*  
51 *Environment*, 1995, 18(4): 339-355.
- 52 Leuning R, Zhang Y Q, Rajaud A, et al. A simple surface conductance model to estimate regional  
53 evaporation using MODIS leaf area index and the Penman-Monteith equation[J]. *Water Resources*  
54 *Research*, 2008, 44(10).
- 55 Lian X, Piao S, Huntingford C, et al. Partitioning global land evapotranspiration using CMIP5 models  
56 constrained by observations[J]. *Nature Climate Change*, 2018, 8(7): 640-646.
- 57 Lin Y S, Medlyn B E, Duursma R A, et al. Optimal stomatal behaviour around the world[J]. *Nature Climate*  
58 *Change*, 2015, 5(5): 459-464.
- 59 Maire V, Martre P, Kattge J, et al. The coordination of leaf photosynthesis links C and N fluxes in C<sub>3</sub> plant  
60 species[J]. *PloS one*, 2012, 7(6): e38345.
- 61 Medlyn B E, Duursma R A, Eamus D, et al. Reconciling the optimal and empirical approaches to modelling  
62 stomatal conductance[J]. *Global Change Biology*, 2011, 17(6): 2134-2144.

- 33 Moran M S, Clarke T R, Inoue Y, et al. Estimating crop water deficit using the relation between surface-air  
34 temperature and spectral vegetation index[J]. *Remote sensing of environment*, 1994, 49(3): 246-263.
- 35 Mu Q, Heinsch F A, Zhao M, et al. Development of a global evapotranspiration algorithm based on MODIS  
36 and global meteorology data[J]. *Remote sensing of Environment*, 2007, 111(4): 519-536.
- 37 Nagler P L, Glenn E P, Nguyen U, et al. Estimating riparian and agricultural actual evapotranspiration by  
38 reference evapotranspiration and MODIS enhanced vegetation index[J]. *Remote Sensing*, 2013, 5(8):  
39 3849-3871.
- 70 Nelson J A, Pérez-Priego O, Zhou S, et al. Ecosystem transpiration and evaporation: Insights from three  
71 water flux partitioning methods across FLUXNET sites[J]. *Global change biology*, 2020, 26(12):  
72 6916-6930.
- 73 Norman J M, Kustas W P, Humes K S. Source approach for estimating soil and vegetation energy fluxes in  
74 observations of directional radiometric surface temperature[J]. *Agricultural and Forest Meteorology*,  
75 1995, 77(3-4): 263-293.
- 76 Oleson K W, Lawrence D M, Gordon B, et al. Technical description of version 4.0 of the Community Land  
77 Model (CLM)[J]. 2010.
- 78 Paschalis A, Faticchi S, Pappas C, et al. Covariation of vegetation and climate constrains present and future  
79 T/ET variability[J]. *Environmental Research Letters*, 2018, 13(10): 104012.
- 30 Perez-Priego O, Katul G, Reichstein M, et al. Partitioning eddy covariance water flux components using  
31 physiological and micrometeorological approaches[J]. *Journal of Geophysical Research:*  
32 *Biogeosciences*, 2018, 123(10): 3353-3370.
- 33 Prentice I C, Dong N, Gleason S M, et al. Balancing the costs of carbon gain and water transport: testing a  
34 new theoretical framework for plant functional ecology[J]. *Ecology letters*, 2014, 17(1): 82-91.
- 35 Priestley C H B, Taylor R J. On the assessment of surface heat flux and evaporation using large-scale  
36 parameters[J]. *Monthly weather review*, 1972, 100(2): 81-92.

- 37 Qiao S, Wang H, Prentice I C, et al. Extending a first-principles primary production model to predict wheat  
38 yields[J]. *Agricultural and Forest Meteorology*, 2020, 287: 107932.
- 39 Reichstein M, Falge E, Baldocchi D, et al. On the separation of net ecosystem exchange into assimilation  
30 and ecosystem respiration: review and improved algorithm[J]. *Global change biology*, 2005, 11(9):  
31 1424-1439.
- 32 Rodell M, Houser P R, Jambor U E A, et al. The global land data assimilation system[J]. *Bulletin of the*  
33 *American Meteorological Society*, 2004, 85(3): 381-394.
- 34 Sage R F. The evolution of C4 photosynthesis[J]. *New phytologist*, 2004, 161(2): 341-370.
- 35 Sayre R T, Kennedy R A, Pringnitz D J. Photosynthetic enzyme activities and localization in *Mollugo*  
36 *verticillata* populations differing in the levels of C3 and C4 cycle operation[J]. *Plant Physiology*, 1979,  
37 64(2): 293-299.
- 38 Scanlon T M, Sahu P. On the correlation structure of water vapor and carbon dioxide in the atmospheric  
39 surface layer: A basis for flux partitioning[J]. *Water Resources Research*, 2008, 44(10).
- 40 Smith N G, Keenan T F, Colin Prentice I, et al. Global photosynthetic capacity is optimized to the  
41 environment[J]. *Ecology letters*, 2019, 22(3): 506-517.
- 42 Stocker B D, Zscheischler J, Keenan T F, et al. Quantifying soil moisture impacts on light use efficiency  
43 across biomes[J]. *New Phytologist*, 2018, 218(4): 1430-1449.
- 44 Stocker B D, Wang H, Smith N G, et al. P-model v1. 0: an optimality-based light use efficiency model for  
45 simulating ecosystem gross primary production[J]. *Geoscientific Model Development*, 2020, 13(3):  
46 1545-1581.
- 47 Su Z. The Surface Energy Balance System (SEBS) for estimation of turbulent heat fluxes[J]. *Hydrology and*  
48 *earth system sciences*, 2002, 6(1): 85-99.
- 49 Tan S, Wu B, Yan N. A method for downscaling daily evapotranspiration based on 30-m surface  
10 resistance[J]. *Journal of Hydrology*, 2019, 577: 123882.

- 11 Thom A S. Momentum, mass and heat exchange of vegetation[J]. Quarterly Journal of the Royal  
12 Meteorological Society, 1972, 98(415): 124-134.
- 13 Torres A F, Walker W R, McKee M. Forecasting daily potential evapotranspiration using machine learning  
14 and limited climatic data[J]. Agricultural Water Management, 2011, 98(4): 553-562.
- 15 Trenberth K E, Fasullo J T, Kiehl J. Earth's global energy budget[J]. Bulletin of the American  
16 Meteorological Society, 2009, 90(3): 311-324.
- 17 Wang H, Prentice I C, Keenan T F, et al. Towards a universal model for carbon dioxide uptake by plants[J].  
18 Nature Plants, 2017, 3(9): 734-741.
- 19 Wong S C, Cowan I R, Farquhar G D. Stomatal conductance correlates with photosynthetic capacity[J].  
20 Nature, 1979, 282(5737): 424-426.
- 21 Wright, I.J., Reich, P.B. & Westoby, M. (2003). Least-cost input mixtures of water and nitrogen for  
22 photosynthesis. The American Naturalist, 161, 98-111.
- 23 Wang L, Good S P, Caylor K K. Global synthesis of vegetation control on evapotranspiration partitioning[J].  
24 Geophysical Research Letters, 2014, 41(19): 6753-6757.
- 25 Wei Z, Yoshimura K, Wang L, et al. Revisiting the contribution of transpiration to global terrestrial  
26 evapotranspiration[J]. Geophysical Research Letters, 2017, 44(6): 2792-2801.
- 27 Wu B, Yan N, Xiong J, et al. Validation of ETWatch using field measurements at diverse landscapes: A case  
28 study in Hai Basin of China[J]. Journal of Hydrology, 2012, 436: 67-80.
- 29 Yang Y, Roderick M L, Zhang S, et al. Hydrologic implications of vegetation response to elevated CO<sub>2</sub> in  
30 climate projections[J]. Nature Climate Change, 2019, 9(1): 44-48.
- 31 Zeng H, Wu B, Zhu W, et al. A trade-off method between environment restoration and human water  
32 consumption: A case study in Ebinur Lake[J]. Journal of cleaner production, 2019, 217: 732-741.

- 33 Zhang X, Wu B, Ponce-Campos G E, et al. Mapping up-to-date paddy rice extent at 10 m resolution in  
34 China through the integration of optical and synthetic aperture radar images[J]. Remote Sensing, 2018,  
35 10(8): 1200.
- 36 Zhang Y, Leuning R, Hutley L B, et al. Using long-term water balances to parameterize surface  
37 conductances and calculate evaporation at 0.05 spatial resolution[J]. Water Resources Research, 2010,  
38 46(5).
- 39 Zhang Y, Kong D, Gan R, et al. Coupled estimation of 500 m and 8-day resolution global evapotranspiration  
40 and gross primary production in 2002–2017[J]. Remote sensing of environment, 2019, 222: 165-182.
- 41 Zhang Z, Zhang Y, Zhang Y, et al. The potential of satellite FPAR product for GPP estimation: An indirect  
42 evaluation using solar-induced chlorophyll fluorescence[J]. Remote Sensing of Environment, 2020, 240:  
43 111686.
- 44 Zhou S, Yu B, Zhang Y, et al. Water use efficiency and evapotranspiration partitioning for three typical  
45 ecosystems in the Heihe River Basin, northwestern China[J]. Agricultural and Forest Meteorology, 2018,  
46 253: 261-273.
- 47 Zhu Z, Piao S, Myneni R B, et al. Greening of the Earth and its drivers[J]. Nature climate change, 2016, 6(8):  
48 791-795.  
49

50 **Supplementary Information**

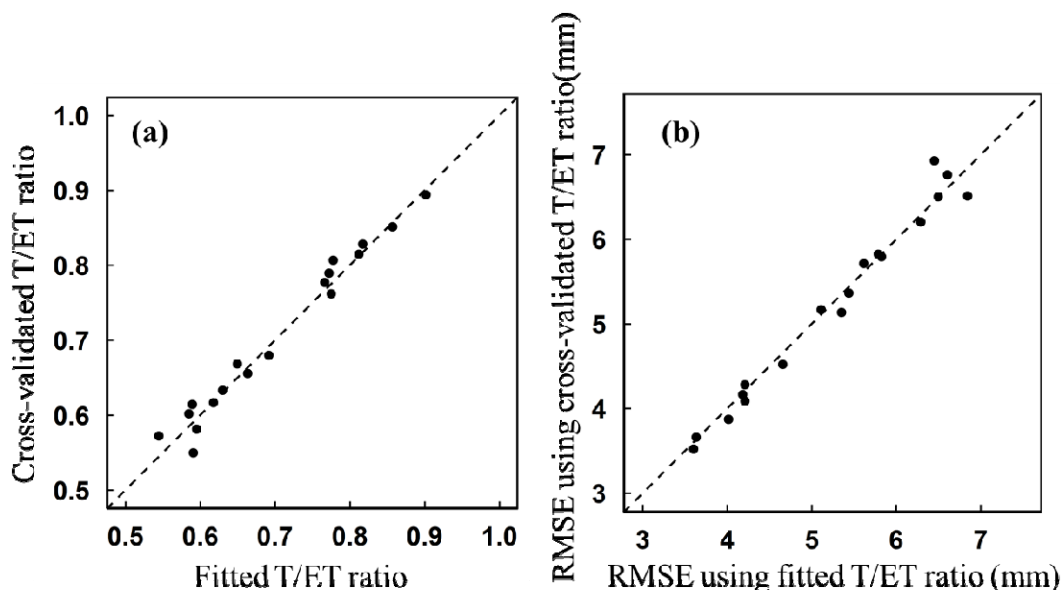

51

52 **Fig. S1. Cross-validation of the T/ET fitting theory.** X-axis is fitted T/ET ratio (in panel a) and RMSE  
 53 of ET result (in panel b) using the universal function. Y-axis is T/ET ratio (in panel a) and RMSE of ET  
 54 result (in panel b) result using the cross-validated function (exempting each target site during fitting).

55

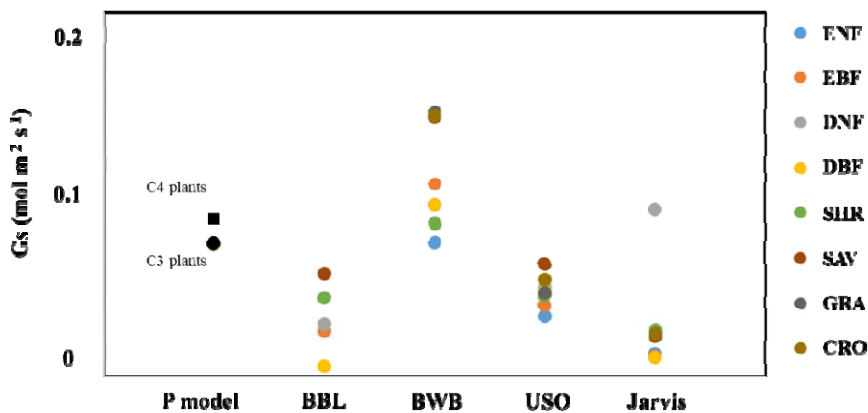

56

57 **Fig. S2. Comparison of typical conductance models under baseline condition** ( $\rho_a=20$ ,  
 58  $VPD=10\text{hPa}$ ,  $fAPAR=0.8$ ,  $\rho_a=380\ \mu\text{mol mol}^{-1}$ ,  $SWC=0.2\ \text{m}^3\ \text{m}^{-3}$ ,  $PPFD=275\ \mu\text{mol}^{-2}\ \text{photon s}^{-1}$ ). Two black  
 59 points represents result estimated by C3 and C4 P model version respectively. Different colour represents

30 different biomes types. BBL represents Ball-Berry-Leuning conductance model (Leuning, 1995), BWB  
31 represents Ball-Berry model (Ball and Berry, 1987), USO represents Mdelyn model (Medlyn et al., 2011),  
32 Jarvis represents Jarvis model (Jarvis, 1976). For each conductance model requires GPP as input, we use the  
33 result estimated by P model.

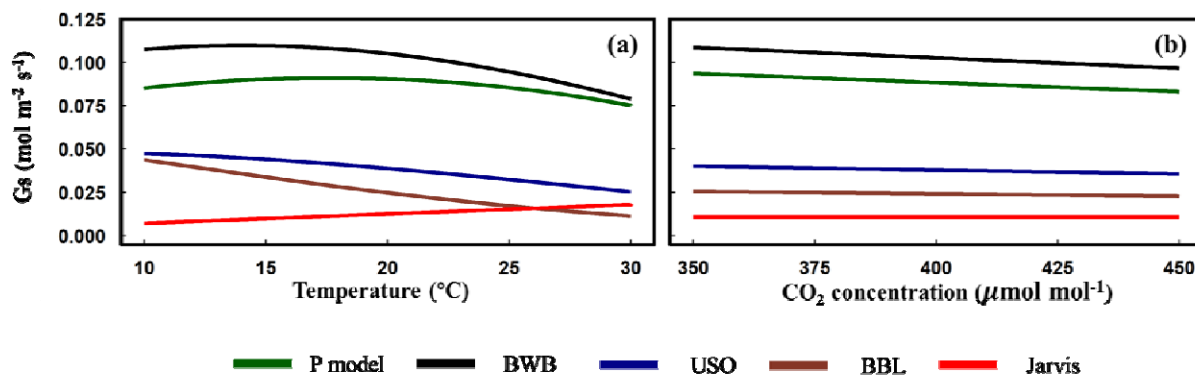

34

35 **Fig. S3. Comparison of typical conductance models response to increasing temperature and**  
36 **ambient CO<sub>2</sub> concentration.** Baseline condition and model code is the same with Fig. S1.

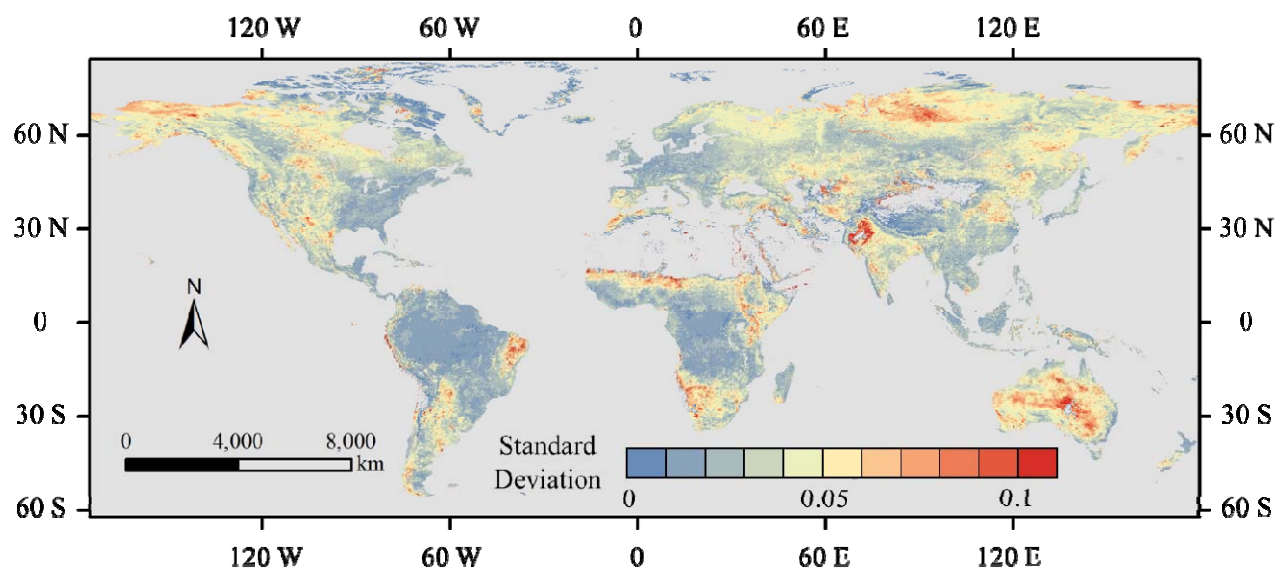

37

38 **Fig. S4. Standard deviation map of PML T/ET ratio.** The calculation is based on the PML v2 product  
39 from 2003 to 2017 (Zhang et al., 2019).

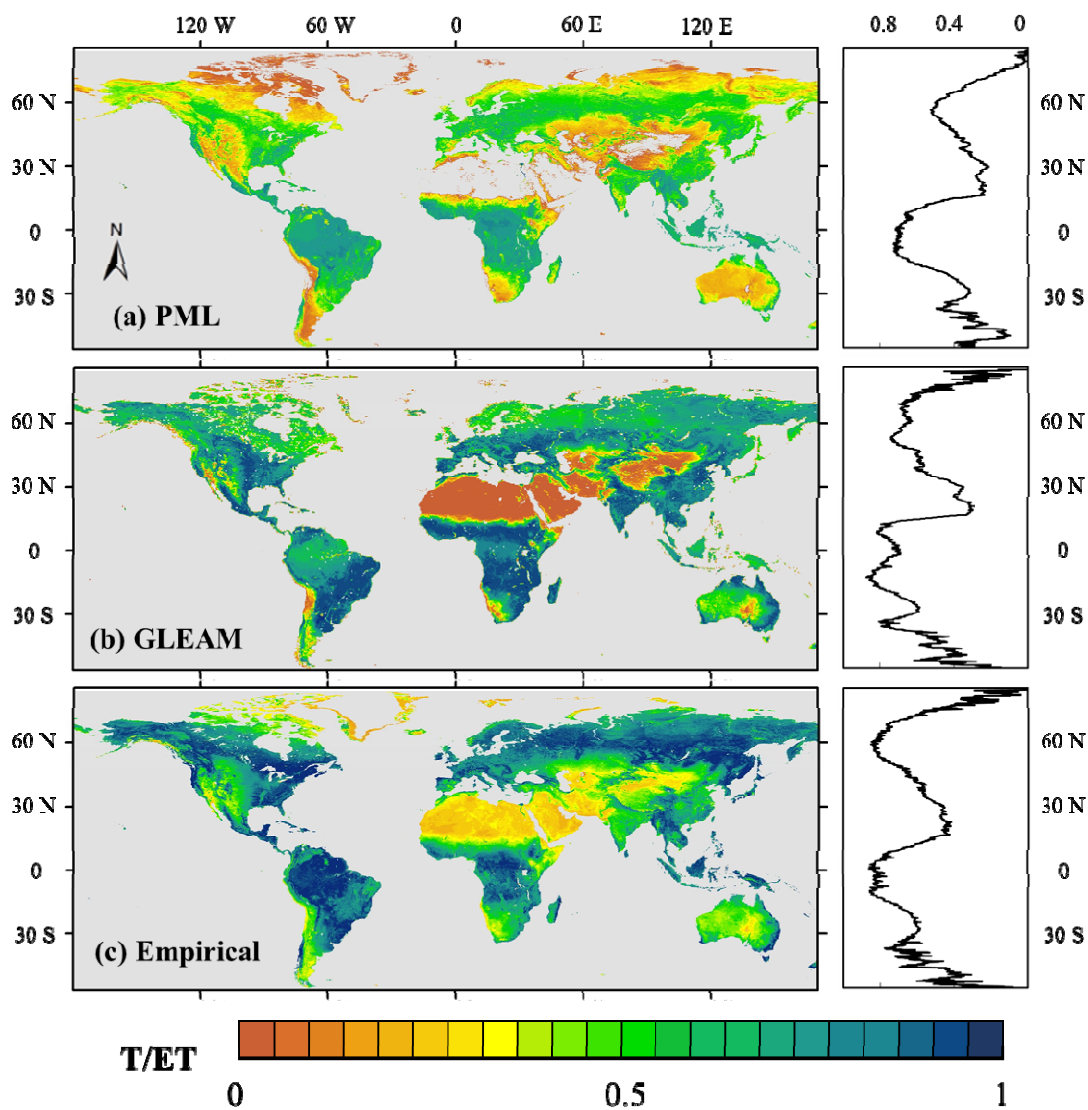

**Fig. S5. Global distribution of T/ET ratio, provided by (a) PML, (b) GLEAM, and (c) the empirical method in this research.** Latitude T/ET profile of each product is given next to each map. Data displayed here is an average between 2003 to 2017, during the period the PML product is available.



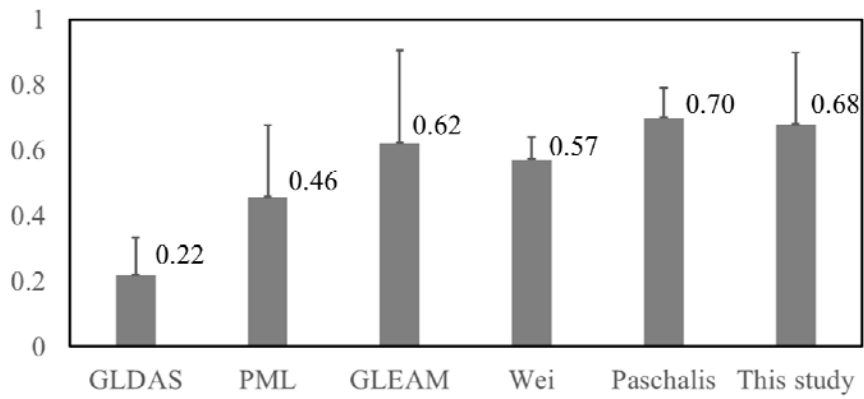

74

75

**Fig. S6. Summarized result of global T/ET ratio.** Mean T/ET value is labelled next to each column.

76

Standard deviation is represented by the error bar. Result of Wei was reported by Wei et al., (2017). Result of

77

Paschalis was reported by Paschalis et al., (2018). Global products (GLDAS v2.1, PML v2 and GLEAM

78

v3.3) are calculated based on data between 2003 to 2017.
